# Supplementary material
Source: PubMed Central journal article supplement (PMC5323321)

## Control Mouse

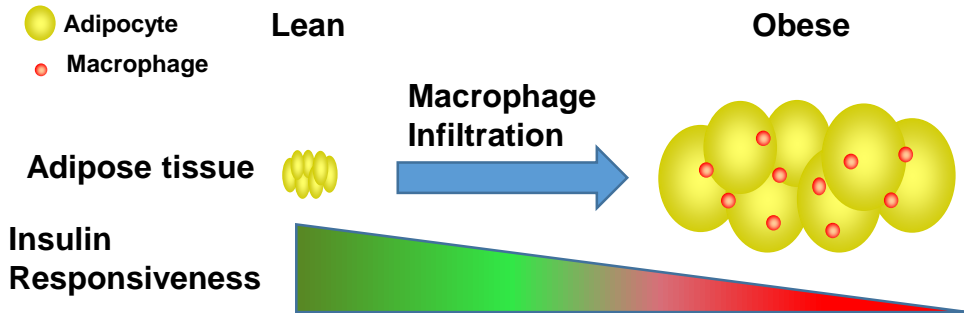

## Adipocyte-specific NOX4 knockout Mouse

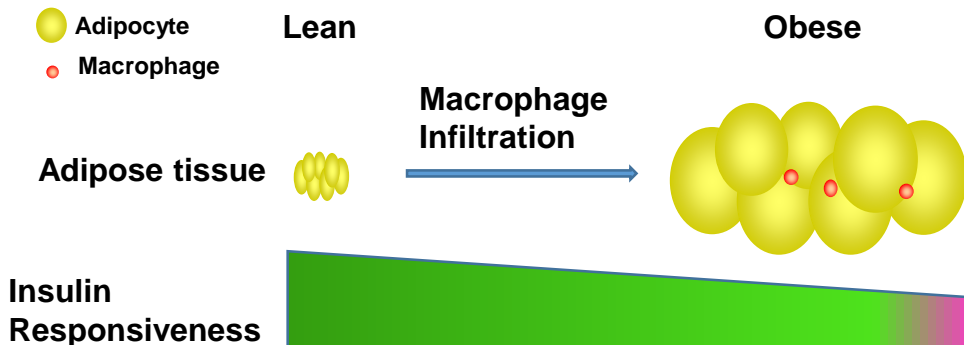

Supplement: NIHMS838645-supplement-Graphic_Abstract.pdf [file NIHMS838645-supplement-Graphic_Abstract.pdf]
